# Supplementary material
Source: PubMed Central journal article supplement (PMC5911693)
Supplement: Supp_Data.pdf [file Supp_Data.pdf]

## **Fall 2014 CURE Report**

A Collaborative Project Funded by HHMI

The CURE survey offers a comparison of learning benefits between course experiences and undergraduate research experiences. The pre-course survey collects student data based upon demographic questions, reasons for taking the course, level of experience on various course elements, science attitudes, and learning style. The post-course survey parallels the pre-course survey and includes additional questions that focus on student estimates of learning gains in specified course elements, estimates of learning benefits that parallel questions in the SURE surveys, overall evaluation of the experience, and science attitudes.

David Lopatto  
Leslie Jaworski

**Fall 2014 CURE Report**

A Collaborative Project Funded by HHMI

Summary for **Indiana University-Purdue University (IUPUI)** - BIO-K102

|            | <b>Your Students</b> |            | <b>All Students*</b> |            |
|------------|----------------------|------------|----------------------|------------|
|            | PreCourse            | PostCourse | PreCourse            | PostCourse |
| <b>N**</b> | 38                   | 31         | 5057                 | 4962       |

\* The data from "all students" in this report was obtained from the CURE Survey between June 1, 2014 - January 6, 2015.

\*\* N represents the total number of respondents. Note that not every respondent answered each question in the survey, resulting in Ns smaller than the total (participation) postcourse N. In such instances, the total is represented by a lower case n.

**Demographics**

|          | <b>Your Students</b> |            | <b>All Students</b> |            | <b>Gender</b> |
|----------|----------------------|------------|---------------------|------------|---------------|
|          | PreCourse            | PostCourse | PreCourse           | PostCourse |               |
|          | 12                   | 10         | 1910                | 1875       | <b>Male</b>   |
|          | 23                   | 20         | 3048                | 2996       | <b>Female</b> |
| <b>n</b> | 35                   | 30         | 4958                | 4871       |               |

|          | <b>Your Students</b> |            | <b>All Students</b> |            | <b>Ethnicity</b>                 |
|----------|----------------------|------------|---------------------|------------|----------------------------------|
|          | PreCourse            | PostCourse | PreCourse           | PostCourse |                                  |
|          | 0                    | 0          | 0                   | 6          | <b>Alaskan Native</b>            |
|          | 0                    | 0          | 9                   | 12         | <b>American Indian</b>           |
|          | 5                    | 3          | 719                 | 812        | <b>Asian American</b>            |
|          | 1                    | 1          | 376                 | 308        | <b>Black or African American</b> |
|          | 0                    | 0          | 48                  | 48         | <b>Filipino</b>                  |
|          | 0                    | 0          | 108                 | 100        | <b>Foreign National</b>          |
|          | 0                    | 0          | 2                   | 1          | <b>Hawaiian</b>                  |
|          | 1                    | 1          | 324                 | 303        | <b>Hispanic/Latino</b>           |
|          | 0                    | 1          | 7                   | 9          | <b>Pacific Islander</b>          |
|          | 28                   | 23         | 2933                | 2796       | <b>White</b>                     |
|          | 1                    | 1          | 233                 | 222        | <b>Two or more races</b>         |
|          | 0                    | 0          | 118                 | 121        | <b>Other</b>                     |
| <b>n</b> | 36                   | 30         | 4877                | 4738       |                                  |

| <b>Your Students</b> |            | <b>All Students</b> |            | <b>Current Status</b>              |
|----------------------|------------|---------------------|------------|------------------------------------|
| PreCourse            | PostCourse | PreCourse           | PostCourse |                                    |
| 0                    | 0          | 8                   | 5          | <b>High School</b>                 |
| 32                   | 27         | 2060                | 1934       | <b>First-year college student</b>  |
| 3                    | 2          | 1279                | 1356       | <b>Second-year college student</b> |
| 0                    | 0          | 846                 | 758        | <b>Third-year college student</b>  |
| 1                    | 1          | 698                 | 725        | <b>Fourth-year college student</b> |
| 0                    | 0          | 30                  | 23         | <b>Graduate or medical student</b> |
| 0                    | 0          | 81                  | 90         | <b>Other</b>                       |
| <b>n</b>             | 36         | 30                  | 5002       | 4891                               |

**Academic Information**

| <b>Your Students</b> |            | <b>All Students</b> |            | <b>Declared Major</b> |
|----------------------|------------|---------------------|------------|-----------------------|
| PreCourse            | PostCourse | PreCourse           | PostCourse |                       |
| 35                   | 28         | 3164                | 3303       | <b>Yes</b>            |
| 1                    | 2          | 1873                | 1633       | <b>No</b>             |
| <b>n</b>             | 36         | 30                  | 5037       | 4936                  |

| <b>Your Students</b> |            | <b>All Students</b> |            | <b>Considering Science Major</b><br><i>(excludes those already science majors)</i> |
|----------------------|------------|---------------------|------------|------------------------------------------------------------------------------------|
| PreCourse            | PostCourse | PreCourse           | PostCourse |                                                                                    |
| 1                    | 2          | 960                 | 930        | <b>Definitely yes</b>                                                              |
| 0                    | 0          | 669                 | 426        | <b>It is likely</b>                                                                |
| 0                    | 0          | 141                 | 127        | <b>I'm not sure</b>                                                                |
| 0                    | 0          | 71                  | 80         | <b>It is unlikely</b>                                                              |
| 0                    | 0          | 21                  | 46         | <b>Definitely no</b>                                                               |
| <b>n</b>             | 1          | 2                   | 1862       | 1609                                                                               |

**PreCourse Survey: Post-Graduate Plans**

| <b>Your Students</b> | <b>All Students</b> | <b>%</b> |                                                                                 |
|----------------------|---------------------|----------|---------------------------------------------------------------------------------|
| 2                    | 613                 | 12.9%    | <b>Grad school for Ph.D. in biology field</b>                                   |
| 1                    | 145                 | 3.0%     | <b>Grad school for Ph.D. in physical science field</b>                          |
| 0                    | 265                 | 5.6%     | <b>Grad school for Masters in life science</b>                                  |
| 1                    | 176                 | 3.7%     | <b>Grad school for Masters in physical science</b>                              |
| 4                    | 173                 | 3.6%     | <b>Grad School for Ph.D. or Masters in social science</b>                       |
| 0                    | 38                  | 0.8%     | <b>Grad school for Ph.D. or Masters in humanities or fine arts</b>              |
| 0                    | 56                  | 1.2%     | <b>Earn certification or degree to qualify for teaching</b>                     |
| 11                   | 1467                | 30.8%    | <b>Go to school for a medical degree (M.D.)</b>                                 |
| 10                   | 756                 | 15.9%    | <b>Go to school for an M.D./PhD.</b>                                            |
| 6                    | 709                 | 14.9%    | <b>Go to school for other health professions</b>                                |
| 2                    | 148                 | 3.1%     | <b>Go to grad school for professional degree other than above (such as law)</b> |
| 1                    | 215                 | 4.5%     | <b>No graduate education in near future</b>                                     |
| n 38                 | 4761                |          |                                                                                 |

**PostCourse Survey: Post-Graduate Plans**

| <b>Your Students</b> | <b>All Students</b> | <b>%</b> |                                                                    |
|----------------------|---------------------|----------|--------------------------------------------------------------------|
| 0                    | 438                 | 10.3%    | <b>I have not considered post-graduate education</b>               |
| 1                    | 112                 | 2.6%     | <b>I now plan NOT to pursue post-graduate education</b>            |
| 2                    | 800                 | 18.9%    | <b>I now plan to pursue a Master's degree in science field</b>     |
| 12                   | 997                 | 23.6%    | <b>I now plan to pursue a Doctoral degree in science field</b>     |
| 0                    | 148                 | 3.5%     | <b>I now plan to pursue a Master's degree in non-science field</b> |
| 0                    | 73                  | 1.7%     | <b>I now plan to pursue a Doctoral degree in non-science field</b> |
| 14                   | 1589                | 37.5%    | <b>I now plan to pursue a medical degree</b>                       |
| 1                    | 76                  | 1.8%     | <b>I now plan to pursue a law, architectural, or other degree</b>  |
| n 30                 | 4233                |          |                                                                    |

**PreCourse Survey: Reasons for Taking Course**  
**10 reasons for taking a course**

**1 = Not important, 3 = very important**

| <b>Your Students</b>       |                 |             |    |                                                               |
|----------------------------|-----------------|-------------|----|---------------------------------------------------------------|
| <b>Level of Importance</b> |                 |             |    |                                                               |
| <b>Not</b>                 | <b>Moderate</b> | <b>Very</b> |    |                                                               |
| 2                          | 13              | 20          | 35 | <b>To fill a distribution requirement</b>                     |
| 0                          | 3               | 33          | 36 | <b>To fill a requirement for my major</b>                     |
| 3                          | 5               | 28          | 36 | <b>I need it for graduate or professional school</b>          |
| 0                          | 8               | 28          | 36 | <b>I need it for my desired employment after college</b>      |
| 1                          | 10              | 26          | 37 | <b>Interest in the subject matter</b>                         |
| 4                          | 10              | 23          | 37 | <b>To learn lab techniques</b>                                |
| 4                          | 7               | 26          | 37 | <b>To learn about science and the research process</b>        |
| 3                          | 9               | 25          | 37 | <b>To get hands-on research experience</b>                    |
| 12                         | 13              | 12          | 37 | <b>It fit in my schedule</b>                                  |
| 1                          | 16              | 20          | 37 | <b>The course and/or the instructor has a good reputation</b> |

\* Each student was asked to rate each reason for taking the course.

**Course Elements****25 items about course elements**

On the pre-course survey, students were asked to assess their prior experience on each element. They were asked to rate their experience on a scale where 1 means no experience or that the student feels inexperienced and 5 means much experience or that the student feels that she or he has mastered the element. These data are most useful, first, descriptively, and second, as covariates that aid in the interpretation of other data. On the post-course survey, the students were asked to "rate the gains you may have made as a result of taking this course."

The 5-point scale, where 1 = no or very small gain to 5 = very large gain, is consistent with the scale used to rate other learning gains.

*Means are used to represent the data.*

| <b>Your Students</b> |            | <b>All Students</b> |            |                                                                  |
|----------------------|------------|---------------------|------------|------------------------------------------------------------------|
| PreCourse            | PostCourse | PreCourse           | PostCourse |                                                                  |
| Experience           | Gain       | Experience          | Gain       |                                                                  |
| 3.46                 | 3.55       | 3.45                | 3.26       | <b>Scripted lab or project where students know outcome</b>       |
| 3.16                 | 3.83       | 3.37                | 3.43       | <b>Lab or project where only instructor knows outcome</b>        |
| 2.14                 | 4.23       | 2.47                | 3.38       | <b>Lab or project where no one knows the outcome</b>             |
| 3.72                 | 4.00       | 3.65                | 3.61       | <b>A least one project assigned and structured by instructor</b> |
| 2.78                 | 4.65       | 2.95                | 3.84       | <b>A project where students have input into process or topic</b> |
| 2.30                 | 4.62       | 2.47                | 3.57       | <b>A project entirely of student design</b>                      |
| 3.41                 | 4.03       | 3.57                | 3.37       | <b>Work individually</b>                                         |
| 2.89                 | 3.32       | 3.11                | 3.15       | <b>Work as a whole class</b>                                     |
| 3.89                 | 4.32       | 3.83                | 3.87       | <b>Work in small groups</b>                                      |
| 3.78                 | 4.45       | 3.78                | 3.88       | <b>Become responsible for a part of the project</b>              |
| 2.81                 | 4.26       | 2.99                | 3.55       | <b>Read primary scientific literature</b>                        |
| 2.30                 | 4.42       | 2.41                | 3.45       | <b>Write a research proposal</b>                                 |
| 3.86                 | 4.58       | 3.69                | 3.88       | <b>Collect data</b>                                              |
| 3.68                 | 4.65       | 3.61                | 4.02       | <b>Analyze data</b>                                              |
| 2.86                 | 4.58       | 3.10                | 3.61       | <b>Present results orally</b>                                    |
| 3.19                 | 4.52       | 3.36                | 3.70       | <b>Present results in written papers or reports</b>              |
| 2.89                 | 4.61       | 2.94                | 3.26       | <b>Present posters</b>                                           |
| 3.05                 | 3.69       | 2.87                | 3.27       | <b>Critique work of other students</b>                           |
| 4.16                 | 4.13       | 3.97                | 3.46       | <b>Listen to lectures</b>                                        |
| 3.86                 | 3.60       | 4.02                | 3.04       | <b>Read a textbook</b>                                           |
| 3.92                 | 3.68       | 3.83                | 3.43       | <b>Work on problem sets</b>                                      |
| 4.35                 | 4.16       | 4.17                | 3.29       | <b>Take tests in class</b>                                       |
| 3.92                 | 3.80       | 3.88                | 3.48       | <b>Discuss reading materials in class</b>                        |
| 3.03                 | 3.19       | 3.54                | 3.58       | <b>Maintain lab notebook</b>                                     |
| 2.22                 | 3.27       | 2.24                | 3.05       | <b>Computer modeling</b>                                         |

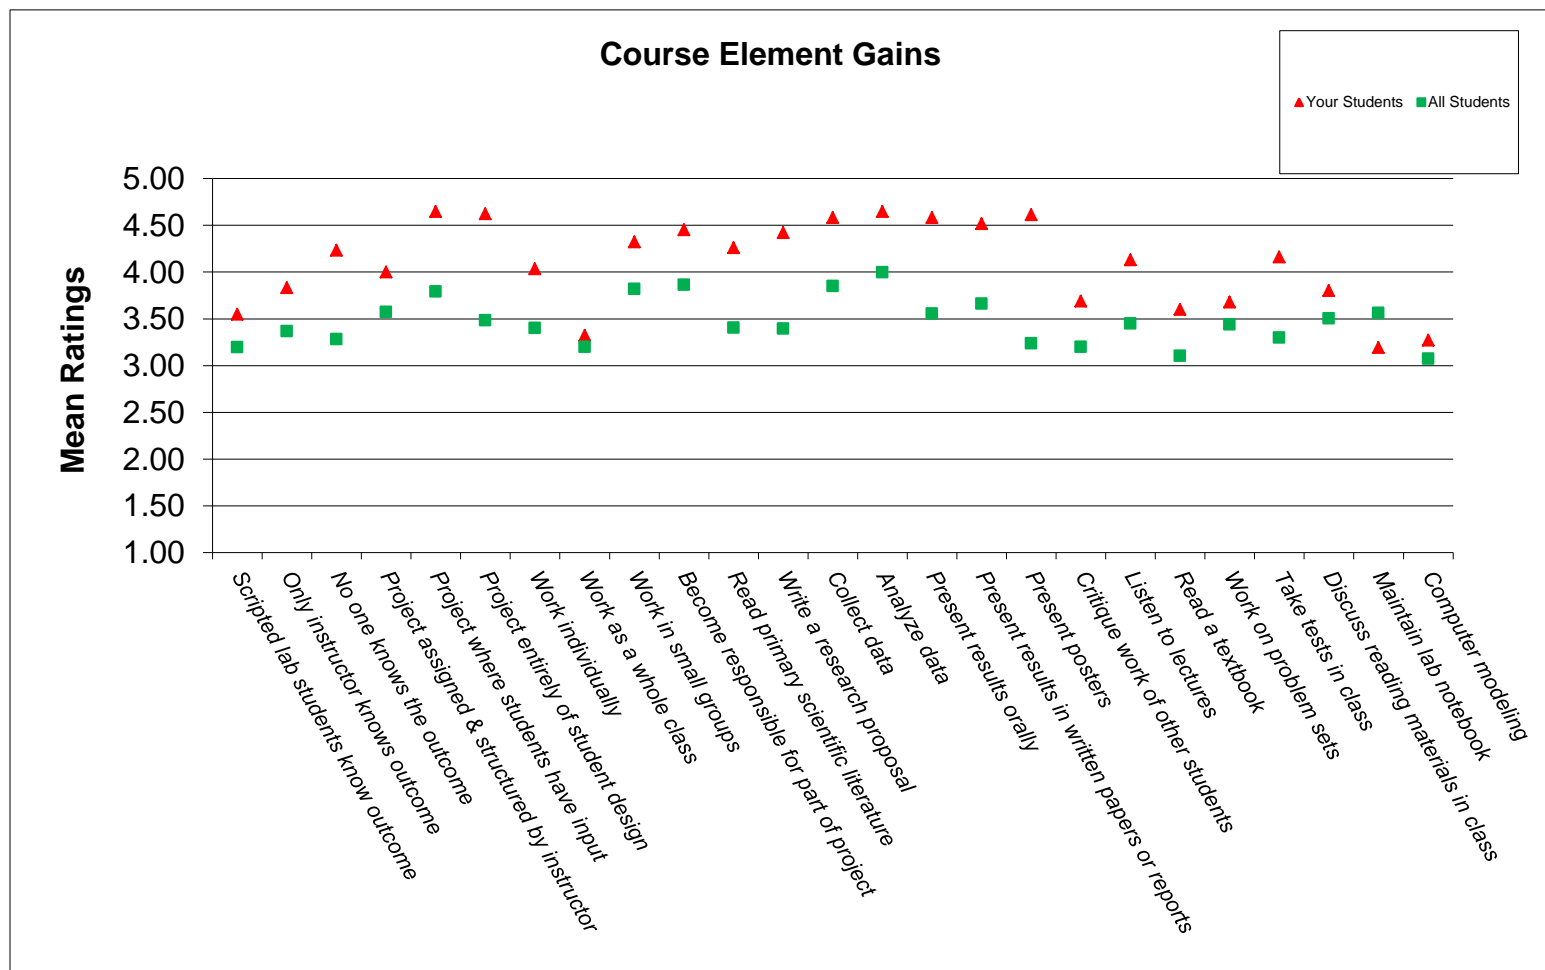

Figure 1. The figure illustrates the mean ratings by students of gains in 25 areas corresponding to the course elements above.

**PostCourse Survey: Benefits**  
**21 items about learning gains**

The learning gain items below are the same as a list of gains students assess when they complete the SURE survey, an assessment of summer undergraduate research experiences. The parallel between the two surveys permits an analysis of how well the course experience emulates the gains of a research experience. A consistent result is that CURE means on most items, except for writing and ethics, are lower than SURE means. In addition, courses with a research-like component yield means higher than courses with no research-like component. The means shown for the benchmark on the right are for all CURE participants, regardless of course. The scale is 1 to 5, with 5 being the largest gain. These items appear only on the post-course survey. *Means are used to represent the data.*

| <b>Your Students</b> | <b>All Students</b> | <b>SD</b> |                                                                             |
|----------------------|---------------------|-----------|-----------------------------------------------------------------------------|
| <b>n≤31</b>          | <b>n≤4807</b>       |           |                                                                             |
| 3.48                 | 2.96                | 1.24      | <b>Clarification of a career path</b>                                       |
| 4.00                 | 3.54                | 1.03      | <b>Skill in interpretation of results</b>                                   |
| 4.10                 | 3.49                | 1.05      | <b>Tolerance for obstacles faced in the research process</b>                |
| 4.16                 | 3.41                | 1.08      | <b>Readiness for more demanding research</b>                                |
| 3.94                 | 3.42                | 1.05      | <b>Understanding how knowledge is constructed</b>                           |
| 4.35                 | 3.46                | 1.11      | <b>Understanding the research process</b>                                   |
| 4.16                 | 3.46                | 1.04      | <b>Ability to integrate theory and practice</b>                             |
| 4.19                 | 3.58                | 1.07      | <b>Understanding how scientists work on real problems</b>                   |
| 4.32                 | 3.64                | 1.06      | <b>Understanding that scientific assertions require supporting evidence</b> |
| 4.39                 | 3.74                | 1.01      | <b>Ability to analyze data and other information</b>                        |
| 4.03                 | 3.58                | 1.06      | <b>Understanding science</b>                                                |
| 3.57                 | 3.13                | 1.22      | <b>Learning ethical conduct</b>                                             |
| 4.42                 | 3.77                | 1.10      | <b>Learning laboratory techniques</b>                                       |
| 3.84                 | 3.34                | 1.17      | <b>Ability to read and understand primary literature</b>                    |
| 4.06                 | 3.14                | 1.24      | <b>Skill in how to give an effective oral presentation</b>                  |
| 4.06                 | 3.31                | 1.18      | <b>Skill in science writing</b>                                             |
| 3.90                 | 3.19                | 1.23      | <b>Self-confidence</b>                                                      |
| 4.07                 | 3.40                | 1.10      | <b>Understanding how scientists think</b>                                   |
| 3.81                 | 3.32                | 1.15      | <b>Learning to work independently</b>                                       |
| 4.10                 | 3.47                | 1.13      | <b>Becoming part of a learning community</b>                                |
| 3.34                 | 2.92                | 1.27      | <b>Confidence in my potential as a teacher</b>                              |



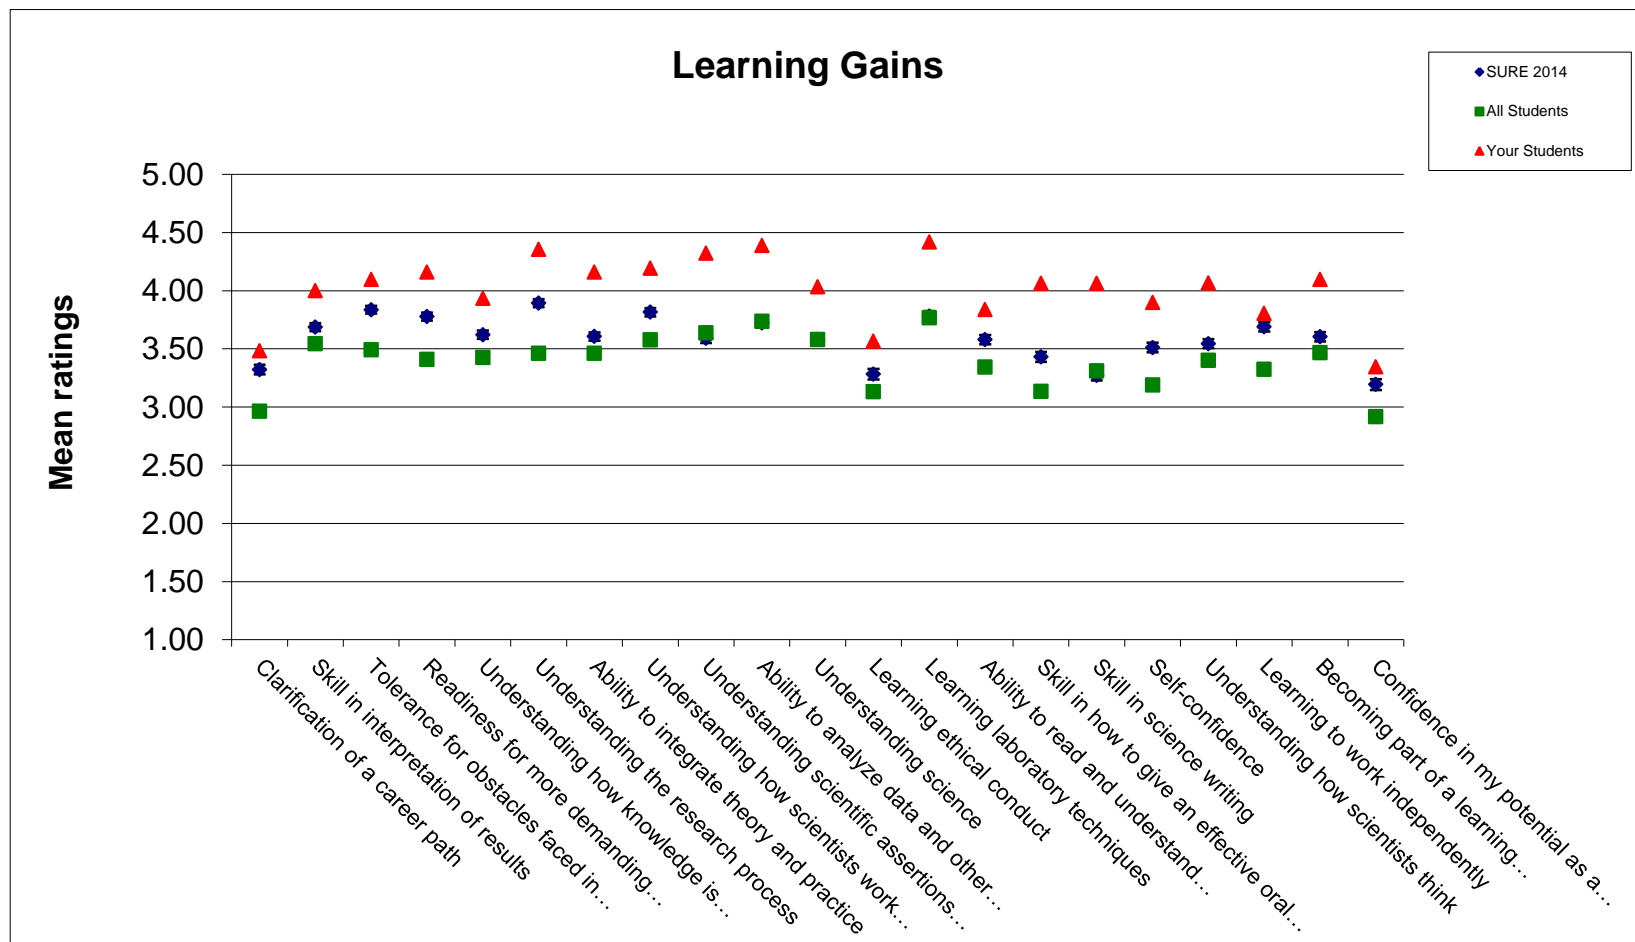

Figure 2. The figure illustrates the mean ratings by students of gains in 21 areas, corresponding to the areas above. As these same items are evaluated by students who participate in summer undergraduate research, the recent results of the Summer Undergraduate Research Experience (SURE) survey are presented for reference. Also presented (green squares) are the overall mean ratings by the reference cohort of students who completed the CURE survey in the fall of 2014. The vertical lines around the SURE means represent 2 standard errors above and below. *Note:* Data from students who completed the pre-course survey and those who did not are indistinguishable.

**Attitudes about Science****22 questions about science**

These items appear on both the pre-course survey and the post-course survey. The scale is 1 (strongly disagree) to 5 (strongly agree). We have not found large changes from pre- to post-course survey. Note that 5 items are printed in italics. In exploratory factor analysis these 5 items load on a factor that we have named "engagement". Engagement scores, whether pre-course or post-course, have correlated in our first findings with higher reported learning gains and a greater likelihood to declare a science major. *Means are used to represent the data.*

| <b>Your Students</b> |            | <b>All Students</b> |            |                                                                                                        |
|----------------------|------------|---------------------|------------|--------------------------------------------------------------------------------------------------------|
| PreCourse            | PostCourse | PreCourse           | PostCourse |                                                                                                        |
| 4.06                 | 4.52       | 4.09                | 4.15       | <i>Even if I forget the facts, I'll still be able to use thinking skills learned in science</i>        |
| 3.44                 | 3.45       | 3.34                | 3.32       | You can rely on scientific results to be true and correct                                              |
| 3.97                 | 4.26       | 3.93                | 3.91       | <i>The process of writing in science is helpful for understanding scientific ideas</i>                 |
| 2.82                 | 2.96       | 2.99                | 3.11       | When scientific results conflict with my personal experience, I follow my experience in making choices |
| 2.17                 | 2.06       | 2.26                | 2.49       | Students who do not major/concentrate in science should not have to take science courses               |
| 2.91                 | 2.84       | 2.86                | 2.89       | I wish science instructors would just tell us what we need to know so we can learn it                  |
| 1.82                 | 1.87       | 1.87                | 2.04       | Creativity does not play a role in science                                                             |
| 1.91                 | 2.10       | 1.99                | 2.17       | Science is not connected to non-science fields such as history, literature, economics, or art          |
| 2.86                 | 2.87       | 2.92                | 3.03       | When experts disagree on a science question, it's because they don't know all the facts yet            |
| 4.40                 | 4.39       | 4.24                | 4.20       | <i>I get personal satisfaction when I solve a scientific problem by figuring it out myself</i>         |
| 2.40                 | 2.43       | 2.62                | 2.70       | Since nothing in science is known for certain, all theories are equally valid                          |
| 3.11                 | 2.97       | 3.10                | 3.12       | Science is essentially an accumulation of facts, rules, and formulas                                   |
| 4.14                 | 4.39       | 4.00                | 3.97       | <i>I can do well in science courses</i>                                                                |
| 3.31                 | 3.58       | 3.05                | 3.27       | Real scientists don't follow the scientific method in a straight line                                  |

## Attitudes about Science (cont.)

| <b>Your Students</b> |            | <b>All Students</b> |            |                                                                                       |
|----------------------|------------|---------------------|------------|---------------------------------------------------------------------------------------|
| PreCourse            | PostCourse | PreCourse           | PostCourse |                                                                                       |
| 2.66                 | 2.29       | 2.69                | 2.81       | There is too much emphasis in science classes on figuring things out for yourself     |
| 2.20                 | 2.19       | 2.38                | 2.53       | Only scientific experts are qualified to make judgments on scientific issues          |
| 1.86                 | 2.00       | 1.95                | 2.11       | Scientists know what the results of their experiments will be before they start       |
| 4.06                 | 4.26       | 4.09                | 4.08       | <i>Explaining science ideas to others has helped me understand the ideas better</i>   |
| 2.94                 | 3.45       | 3.26                | 3.38       | Main job of the instructor is to structure the work so that we can learn it ourselves |
| 2.40                 | 2.52       | 2.85                | 2.83       | Scientists play with statistics to support their own ideas                            |
| 3.80                 | 3.84       | 3.73                | 3.64       | Lab experiments are used to confirm information studied in science class              |
| 1.63                 | 1.58       | 1.84                | 1.92       | If an experiment shows that something doesn't work, the experiment was a failure      |

## Learning style items

### 10 pairs of statements

The pre-course survey included 10 self-descriptive items derived from a brief learning style survey published by Romero et al. Each item contained pairs of statements, and the student was to use a 1-6 scale to describe how closely one or the other statement described him or her. Two scales, one a dimension of concrete-abstract information preference and one a dimension of reflective-active learning preference were scored. The diagram below describes the names given to four kinds of learning styles and the majors typically associated with them. We are currently exploring the possible relations between this information and other information from the surveys. See Romero, Tepper, and Tetrault (1992). Development and validation of new scales to measure Kolb's learning style dimensions. *Educational and Psychological Measurement*, 52, 171-180.

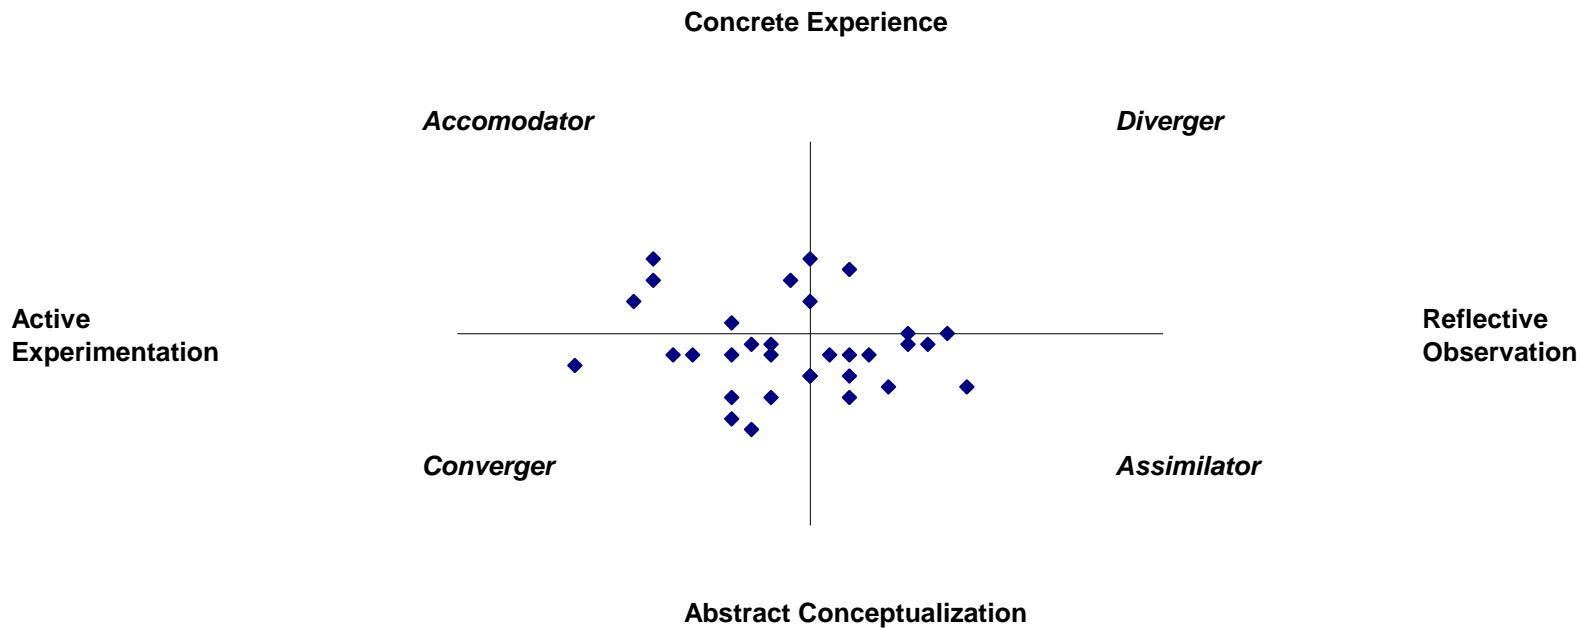

Figure 3. The two dimensions of learning style, with typical majors suggested by Romero, et al. In that report, science majors tended to score in the "Assimilator" or "Converger" quadrants.

**Learning Style Quadrants**

|          | <b>Your Students</b> | <b>All Students</b> | <b>%</b> |                     |
|----------|----------------------|---------------------|----------|---------------------|
|          | 5                    | 1013                | 22.5%    | <b>Divergers</b>    |
|          | 11                   | 1193                | 26.5%    | <b>Assimilators</b> |
|          | 11                   | 1443                | 32.1%    | <b>Convergers</b>   |
|          | 5                    | 853                 | 18.9%    | <b>Accomodators</b> |
| <b>n</b> | 32                   | 4502                |          |                     |

**PostCourse Survey: Overall Assessment**

These four questions serve as an overall assessment of the course. Note that the scale is 1 (strongly disagree) to 5 (strongly agree). The questions are on the post-course survey only. *Means are used to represent the data.*

| <b>Your Students</b> | <b>All Students</b> | <b>SD</b> |                                                                                        |
|----------------------|---------------------|-----------|----------------------------------------------------------------------------------------|
| 4.48                 | 3.88                | 1.07      | <b>This course was a good way of learning about the subject</b>                        |
| 4.68                 | 4.00                | 1.03      | <b>This course was a good way of learning about the process of scientific research</b> |
| 4.45                 | 3.66                | 1.22      | <b>This course had a positive effect on my interest in science</b>                     |
| 4.52                 | 4.06                | 1.04      | <b>I was able to ask questions in this class and get helpful responses</b>             |

Contact: [lopatto@grinnell.edu](mailto:lopatto@grinnell.edu)
