# Supplementary material
Source: PubMed Central journal article supplement (PMC5911693)
Supplement: Supp_Figure1.pdf [file Supp_Figure1.pdf]

## Supplementary Data

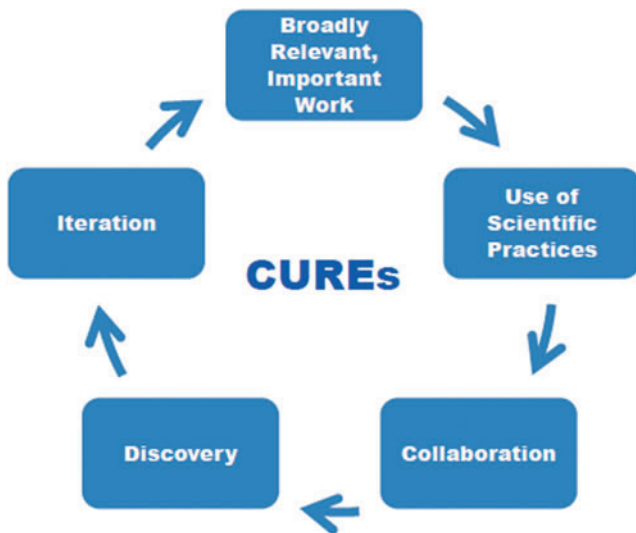

**SUPPLEMENTARY FIG. S1.** Parameters emphasized in the course-based undergraduate research experience (CURE). “In this era of globalization, understanding what it means to create new knowledge should be a core competency for today’s college student ... that can build our national capacity for research and innovation.” Arthur B. Ellis, Vice Chancellor for Research, University of California, San Diego, California.
