# Supplementary material
Source: PubMed Central journal article supplement (PMC5911693)
Supplement: Supp_Table1.pdf [file Supp_Table1.pdf]

SUPPLEMENTARY TABLE S1. NICOTINE AND CAFFEINE TREATMENT CONDITIONS  
TESTED IN RESEARCH LABORATORIES

| <i>Research groups</i>                 | <i>Compound</i>   | <i>Concentration (mM)</i> | <i>Exposure period (hpf)</i> | <i>Effects analyzed</i>     | <i>Conclusions drawn</i>                                 |
|----------------------------------------|-------------------|---------------------------|------------------------------|-----------------------------|----------------------------------------------------------|
| Introductory biology laboratory groups | Nicotine          | 1.3, 1.4, 1.5, 1.6, 1.7   | ~4-48                        | Mortality and heart defects | Mortality and heart defects increased with concentration |
|                                        | Nicotine          | 1.4, 1.5, 1.6, 1.7        | ~4-24                        |                             |                                                          |
| Cell biology laboratory groups         | Nicotine          | 1.5, 1.6, 1.7, 1.8        | 2-8                          | Epiboly progression         | Epiboly progression was delayed                          |
|                                        | Caffeine          | 1.3, 1.4, 1.5             | 2-8                          |                             |                                                          |
|                                        | Nicotine+caffeine | 1.1+1.2, 1.2+1.2, 1.3+1.3 | 2-8                          |                             |                                                          |

hpf, hours post fertilization.
