# Supplementary material
Source: PubMed Central journal article supplement (PMC5911693)
Supplement: Supp_Table2.pdf [file Supp_Table2.pdf]

SUPPLEMENTARY TABLE S2. LIST OF EXPERIMENTS DESIGNED AND EXECUTED BY STUDENTS  
AND THE OUTCOMES OF THE EXPERIMENTS

| <i>Category</i>                                           | <i>Concentration</i>                                                 | <i>Results obtained</i>                                                                                                                                                                           |
|-----------------------------------------------------------|----------------------------------------------------------------------|---------------------------------------------------------------------------------------------------------------------------------------------------------------------------------------------------|
| <b>Environmental toxins</b>                               |                                                                      |                                                                                                                                                                                                   |
| Nitrate                                                   | 4.4, 6.5, 8.7, 10.9, and 13 mM                                       | 96 h nitrite exposure with 13 mM nitrite showed severe morphological defects.                                                                                                                     |
| pH                                                        | 4.19, 4.38, 5.45, 5.63, 6, 6.60, 7, 7.5, 8.09, and 9.89              | pH levels below 5 showed severe defects and low survival rate.                                                                                                                                    |
| PbCl <sub>2</sub>                                         | 0.048, 0.072, 0.145, 0.5, 1, 2, and 5 mM                             | As the concentration crossed 0.145 mM PbCl <sub>2</sub> the survival rate dropped steeply. The incidence of developmental malformations also increased with concentration.                        |
| Sodium fluoride                                           | 2, 4, 4.8, 6, 8.8, 10, 13.3, 20, 25, and 50 mg/L                     | Fluoride exposure at 50 mg/L showed lowest survival rate. There were affected embryos at lower concentrations.                                                                                    |
| <b>Testing effects of prenatal exposure of drugs</b>      |                                                                      |                                                                                                                                                                                                   |
| Aspirin                                                   | 78, 100, 150, 200, 234, and 253 $\mu$ M                              | Survival rate dropped after 200 $\mu$ M and the embryos showed severe morphological defects.                                                                                                      |
| Dextromethorphan                                          | 0.5, 0.65, and 0.85 mM                                               | The highest concentration of dextromethorphan showed lowest survival rate and a significant decrease in eye diameter in comparison to control embryos.                                            |
| Acetaminophen                                             | 100 $\mu$ M, 500 $\mu$ M, 1 mM, 2.5 mM, and 5 mM                     | After 1 mM the survival rates dropped and the embryos showed severe morphological defects including decreased pigmentation, and pericardial edema.                                                |
| Loratadine                                                | 5.2, 10.4, 15.6, 26, 52, and 104 $\mu$ M                             | Higher concentrations of loratadine (26, 52, 104 $\mu$ M) were detrimental. Lower concentrations than that showed severe developmental defects including pericardial edema and short body length. |
| <b>Potential teratogenic agents</b>                       |                                                                      |                                                                                                                                                                                                   |
| Caffeine                                                  | 0.1, 0.5, 1, and 1.5 mM                                              | Caffeine exposure showed significant defects during development including pericardial edema.                                                                                                      |
| Nicotine and caffeine                                     | 1.5 mM nicotine and 500 $\mu$ M caffeine                             | Increased morphological defects such as pericardial edema and shorter body length were seen in cotreated embryos in comparison with controls.                                                     |
| Ethanol and nicotine                                      | 50 mM ethanol and 1.2 mM nicotine; 75 mM ethanol and 1.4 mM nicotine | Decreased survival rate and higher morphological defects in higher concentration treatment groups.                                                                                                |
| Increased salt concentration                              | 2, 5, 10, 10.3, 15.3, and 20.3 ppt                                   | Salt concentration showed a strong effect on survival rate that dropped steeply after 10 ppt.                                                                                                     |
| Red wine                                                  | pH adjusted nonalcoholic red wine and alcoholic red wine             | Nonalcoholic red wine treated embryos showed reduced survival rates and morphological defects, which were comparable to alcoholic red wine.                                                       |
| Coumarin (an ingredient of cinnamon)                      | 300, 450, and 600 mM coumarin dissolved in 0.2% ethanol              | Coumarin exposure showed increasing incidence of affected embryos as concentration increased. 600 mM showed reduced survival rate.                                                                |
| Sodium benzoate (food preservative)                       | 500, 600, and 700 ppm sodium benzoate                                | All concentrations tested showed low survival rates and increased incidence of developmental defects.                                                                                             |
| <b>Potential rescue agents for teratogenic agents</b>     |                                                                      |                                                                                                                                                                                                   |
| EGCG with ethanol exposure                                | 150 mM ethanol and 100 and 150 $\mu$ M, 320 mM EGCG                  | EGCG supplementation could rescue some of the ethanol-induced defects such as body length and eye diameter.                                                                                       |
| Turmeric with ethanol exposure                            | 2 $\mu$ g/mL turmeric and 100 mM ethanol                             | Turmeric cosupplementation showed rescue of body length and eye diameter in comparison to ethanol-treated embryos.                                                                                |
| Prenatal vitamins with ethanol exposure                   | 150 mM ethanol and 75, 56.25 $\mu$ M prenatal vitamin                | Cosupplementation of prenatal vitamins did not rescue the defects caused by ethanol supplementation.                                                                                              |
| Vitamin B12 with ethanol exposure                         | 100 mM ethanol and 40 nM vitamin B12.                                | Vitamin B12 supplementation did not show rescue of body length in comparison to ethanol treated embryos.                                                                                          |
| Folic acid with nicotine exposure                         | 1.4 and 1.5 mM nicotine and 75 $\mu$ M folic acid                    | Folic acid supplementation improved survival and morphological defects induced by nicotine exposure.                                                                                              |
| Retinoic acid with nicotine                               | 1.4 mM nicotine and 1 nM retinoic acid                               | Morphologically retinoic acid supplementation did not show any rescue of the developmental defects.                                                                                               |
| <b>Immediate effects on heart function after exposure</b> |                                                                      |                                                                                                                                                                                                   |
| Caffeine                                                  | 100 $\mu$ M, 500 $\mu$ M, and 1 mM                                   | Dose-dependent increase in heart rate compared to controls.                                                                                                                                       |

In all the experiments embryos were treated with compounds for 2 days and analyzed on the third day except nitrite treatment and heart function study after caffeine exposure.
