# Supplementary material
Source: PubMed Central journal article supplement (PMC5911693)
Supplement: Supp_Table3.pdf [file Supp_Table3.pdf]

SUPPLEMENTARY TABLE S3. PAIRWISE COMPARISON OF DOSE LEVELS FOR SURVIVAL  
(ODDS OF DOSE 1 OVER ODDS OF DOSE 2)

| <i>Dose 1 (mM)</i> | <i>Dose 2 (mM)</i> | <i>t</i> | <i>Pr &gt;  t </i> | <i>Odds ratio</i> | <i>Lower confidence limit for odds ratio</i> | <i>Upper confidence limit for odds ratio</i> |
|--------------------|--------------------|----------|--------------------|-------------------|----------------------------------------------|----------------------------------------------|
| 0                  | 1.3                | 6.35     | <0.0001            | 3.520             | 2.350                                        | 5.274                                        |
| 0                  | 1.4                | 2.90     | 0.0068             | 1.779             | 1.187                                        | 2.665                                        |
| 0                  | 1.5                | 8.43     | <0.0001            | 3.634             | 2.659                                        | 4.967                                        |
| 0                  | 1.6                | 10.55    | <0.0001            | 9.267             | 6.025                                        | 14.253                                       |
| 0                  | 1.7                | 10.77    | <0.0001            | 61.297            | 28.123                                       | 133.604                                      |
| 1.3                | 1.4                | -2.76    | 0.0097             | 0.505             | 0.305                                        | 0.837                                        |
| 1.3                | 1.5                | 0.15     | 0.8823             | 1.032             | 0.668                                        | 1.596                                        |
| 1.3                | 1.6                | 3.75     | 0.0007             | 2.632             | 1.555                                        | 4.455                                        |
| 1.3                | 1.7                | 6.97     | <0.0001            | 17.413            | 7.551                                        | 40.156                                       |
| 1.4                | 1.5                | 3.36     | 0.0021             | 2.043             | 1.324                                        | 3.155                                        |
| 1.4                | 1.6                | 6.43     | <0.0001            | 5.210             | 3.087                                        | 8.794                                        |
| 1.4                | 1.7                | 8.66     | <0.0001            | 34.464            | 14.974                                       | 79.322                                       |
| 1.5                | 1.6                | 4.16     | 0.0002             | 2.550             | 1.612                                        | 4.032                                        |
| 1.5                | 1.7                | 7.25     | <0.0001            | 16.866            | 7.620                                        | 37.333                                       |
| 1.6                | 1.7                | 4.55     | <0.0001            | 6.615             | 2.838                                        | 15.418                                       |

Survival percent was negatively correlated with nicotine dose (Spearman's correlation = -0.62,  $p < 0.0001$ ). Data is presented as a bar graph in Figure 1A.
