# Supplementary material
Source: PubMed Central journal article supplement (PMC5911693)
Supplement: Supp_Table4.pdf [file Supp_Table4.pdf]

SUPPLEMENTARY TABLE S4. PAIRWISE COMPARISON OF DOSE LEVELS FOR HEART DEFECTS  
(ODDS OF DOSE 1 OVER ODDS OF DOSE 2)

| <i>Doses (mM)</i> | <i>t</i> | <i>Pr &gt;  t </i> | <i>Odds ratio</i> | <i>Odds ratio (lower)</i> | <i>Odds ratio (upper)</i> |
|-------------------|----------|--------------------|-------------------|---------------------------|---------------------------|
| 1.4 vs. 1.3       | 16.14    | <0.0001            | 3.4769            | 2.9885                    | 4.0450                    |
| 1.5 vs. 1.3       | -0.87    | 0.3858             | 0.9409            | 0.8200                    | 1.0797                    |
| 1.6 vs. 1.3       | 29.58    | <0.0001            | 25.1883           | 20.3403                   | 31.1919                   |
| 1.7 vs. 1.3       | 16.42    | <0.0001            | 273.76            | 140.12                    | 534.87                    |
| 1.5 vs. 1.4       | -21.51   | <0.0001            | 0.2706            | 0.2402                    | 0.3049                    |
| 1.6 vs. 1.4       | 19.12    | <0.0001            | 7.2445            | 5.9132                    | 8.8756                    |
| 1.7 vs. 1.4       | 12.87    | <0.0001            | 78.7366           | 40.4880                   | 153.12                    |
| 1.6 vs. 1.5       | 33.41    | <0.0001            | 26.7697           | 22.0740                   | 32.4644                   |
| 1.7 vs. 1.5       | 16.76    | <0.0001            | 290.94            | 149.88                    | 564.76                    |
| 1.7 vs. 1.6       | 6.84     | <0.0001            | 10.8684           | 5.4877                    | 21.5247                   |

There is a strong positive correlation between nicotine dose and level of heart defect (Spearman's correlation = 0.80,  $p < 0.0001$ ). Data are presented as a bar graph in Figure 1G.
